# Supplementary material for: A simple, fast, and accurate method of phylogenomic inference
Source: Springer Nature journal article supplement (doi:10.1186/gb-2008-9-10-r151), 2008-10-13

Figure 6

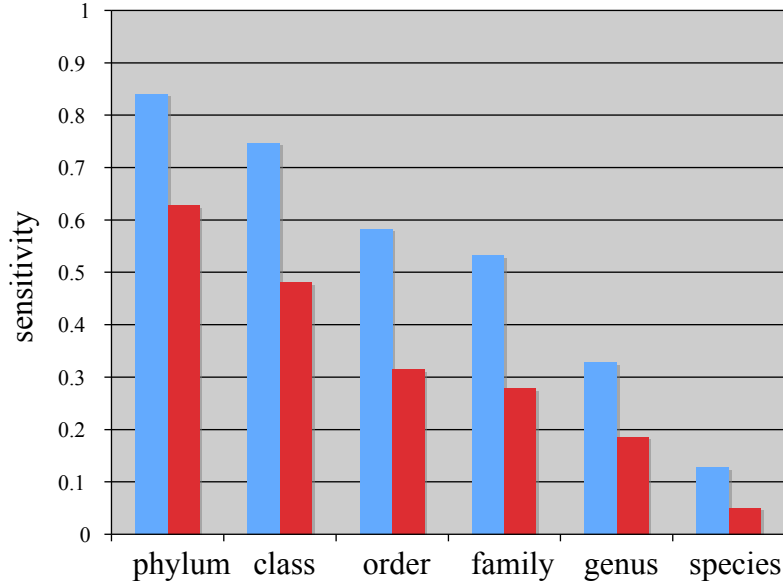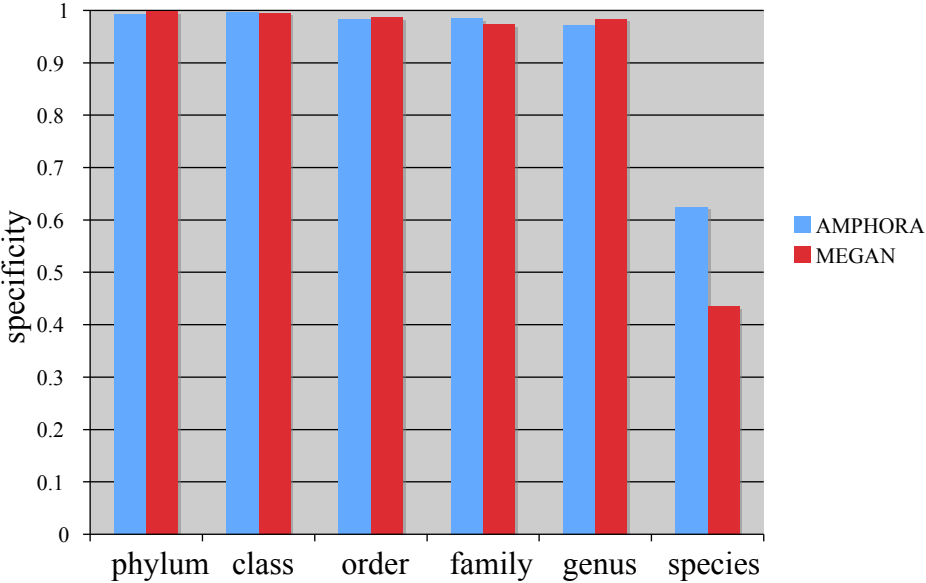

Supplement: 13059_2008_2013_MOESM10_ESM.pdf [file 13059_2008_2013_MOESM10_ESM.pdf]
